# Supplementary material for: Modulating H2 sorption in metal–organic frameworks via ordered functional groups
Source: Royal Society of Chemistry journal article supplement (doi:10.1039/c4cc05265j), 2014-01-01
Supplement: c4cc05265j1.pdf [file c4cc05265j1.pdf]

# **Modulating H<sub>2</sub> Sorption in Metal-organic Frameworks via Ordered Functional Groups**

Phuong V. Dau and Seth M. Cohen\*

*Department of Chemistry and Biochemistry, University of California, San Diego, 9500 Gilman  
Drive, La Jolla, California 92093-0358*

## **Supplementary Information**

\* To whom correspondence should be addressed. E-mail: scohen@ucsd.edu. Telephone: (858)822-5596. Fax: (858) 822-559

## General Methods for Metal-Organic Frameworks Experiments

Starting materials and solvents were purchased and used without further purification from commercial suppliers (Sigma-Aldrich, Alfa Aesar, EMD, TCI, Cambridge Isotope Laboratories, Inc., and others). Proton nuclear magnetic resonance spectra ( $^1\text{H}$  NMR) were recorded by a Varian FT-NMR spectrometer (400 MHz). Chemical shifts are quoted in parts per million (ppm) referenced to the appropriate solvent peak or 0 ppm for TMS. The following abbreviations were used to describe peak patterns when appropriate: br = broad, s = singlet, d = doublet, dd = doublet of doublet, t = triplet, q = quartet, and m = multiplet. Coupling constants,  $J$ , were reported in Hertz unit (Hz). Column chromatography was performed using a CombiFlash automated chromatography system.

### Ligand Synthesis

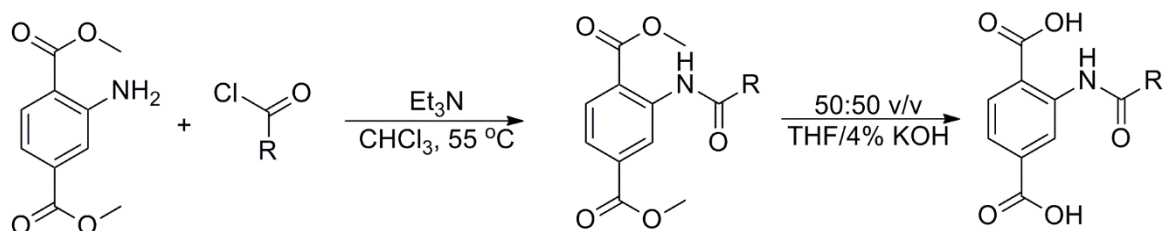

**Figure S1.** General synthesis of aromatic functionalized bdc ligands.

*General procedure for the 2 steps synthesis of aromatic functionalized bdc ligands.*

For the first step, dimethyl 2-aminoterephthalate (10 mmol) was dissolved in  $\text{CHCl}_3$  (150 mL). Several drops of  $\text{Et}_3\text{N}$  were added to the reaction. The acid chloride (11 mmol) was then added to the reaction. The reaction was heated to  $55\text{ }^\circ\text{C}$  overnight. The reaction was cooled to room temperature. The product was purified via column chromatography ( $\text{CH}_2\text{Cl}_2$ ) to afford a white product (yields are between 60-80%).

In the second step, the amide product of the first step (~10 mmol) was dissolved in a mixture of THF and 4%KOH (50:50 v/v, 200 mL total). The reaction was stirred at room temperature overnight. The aqueous layer was separated and acidified with concentrated HCl to yield a white solid as final product. The white solid was collected via vacuum filtration and washed with plenty of water (yields are between 70-99%).

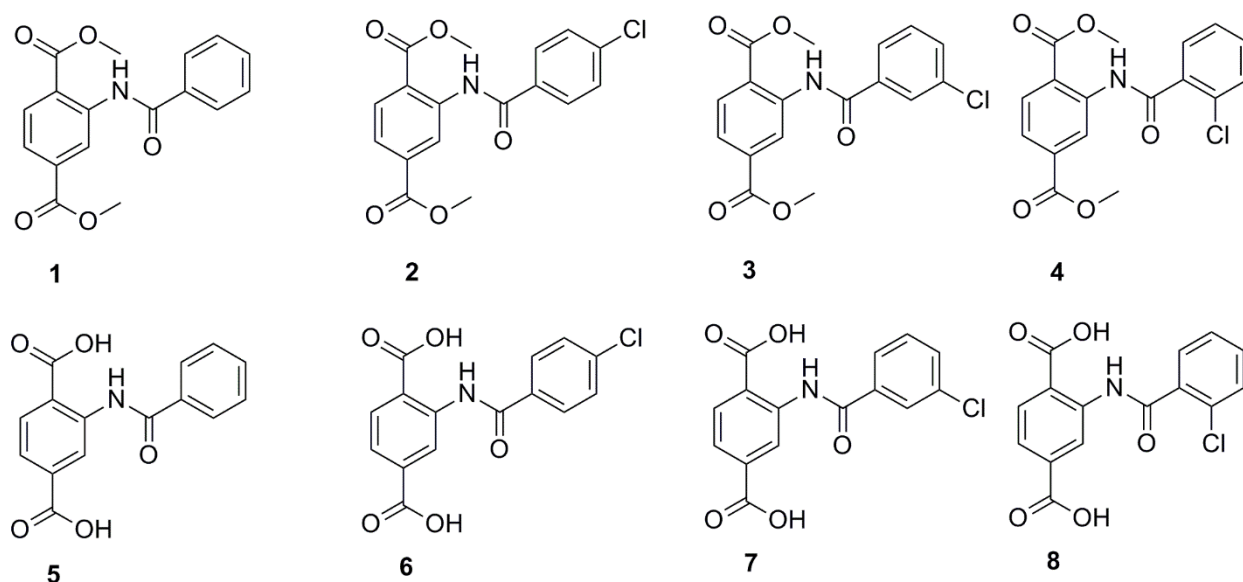

**Figure S2.** Chemical structures of the ester intermediates and aromatic functionalized bdc ligands.

1.  $^1\text{H}$  NMR ( $\text{CDCl}_3$ ):  $\delta$  12.02 (br, 1H), 9.57 (s, 1H), 8.16 (d, 1H,  $J = 8\text{Hz}$ ), 8.07 (d, 2H,  $J = 8\text{Hz}$ ), 7.79 (d, 1H,  $J = 8\text{Hz}$ ), 7.61 ppm (m, 3H), 4.00 (s, 3H), 3.96 (s, 3H). MS: Cald 313.10, Found  $[\text{M}+\text{H}]^+$  313.98  $[\text{M}+\text{NH}_4]^+$  330.80.

2.  $^1\text{H}$  NMR ( $\text{CDCl}_3$ ):  $\delta$  12.04 (br, 1H), 9.53 (s, 1H), 8.16 (d, 1H,  $J = 8\text{Hz}$ ), 8.00 (d, 2H,  $J = 8\text{Hz}$ ), 7.80 (d, 1H,  $J = 8\text{Hz}$ ), 7.51 (d, 2H,  $J = 8\text{Hz}$ ), 4.00 (s, 3H), 3.96 (s, 3H). MS: Cald 347.06, Found  $[\text{M}+\text{H}]^+$  348.02  $[\text{M}+\text{NH}_4]^+$  364.87.

3.  $^1\text{H}$  NMR ( $\text{CDCl}_3$ ):  $\delta$  12.03 (br, 1H), 9.51 (s, 1H), 8.16 (d, 1H,  $J = 8\text{Hz}$ ), 8.05 (s, 1H), 7.91 (d, 1H,  $J = 8\text{Hz}$ ), 7.80 (d, 1H,  $J = 8\text{Hz}$ ), 7.55 (d, 1H,  $J = 8\text{Hz}$ ), 7.48 (t, 1H,  $J = 16\text{Hz}$ ), 4.01 (s, 3H), 3.97 (s, 3H). MS: Cald 347.06, Found  $[\text{M}+\text{H}]^+$  348.02  $[\text{M}+\text{NH}_4]^+$  364.87.

4.  $^1\text{H}$  NMR ( $\text{CDCl}_3$ ):  $\delta$  11.49 (br, 1H), 9.51 (s, 1H), 8.14 (d, 1H,  $J = 8\text{Hz}$ ), 7.80 (d, 1H,  $J = 8\text{Hz}$ ), 7.67 (d, 1H,  $J = 8\text{Hz}$ ), 7.45 (m, 3H), 3.96 (s, 3H), 3.93 (s, 3H). MS: Cald 347.06, Found  $[\text{M}+\text{H}]^+$  348.02  $[\text{M}+\text{NH}_4]^+$  364.87.

5.  $^1\text{H}$  NMR ( $\text{DMSO}-d_6$ ):  $\delta$  12.12 (br, 1H), 9.27 (s, 1H), 8.14 (d, 1H,  $J = 8\text{Hz}$ ), 7.97 (d, 2H,  $J = 8\text{Hz}$ ), 7.74 (dd, 1H,  $J = 12\text{Hz}$ ), 7.63 (m, 3H). MS: Cald 285.06, Found  $[\text{M}-\text{H}]^-$  284.13.

6.  $^1\text{H}$  NMR ( $\text{DMSO}-d_6$ ):  $\delta$  12.08 (br, 1H), 9.20 (s, 1H), 8.13 (d, 1H,  $J = 8\text{Hz}$ ), 7.97 (d, 2H,  $J = 8\text{Hz}$ ), 7.75 (d, 1H,  $J = 8\text{Hz}$ ), 7.69 (d, 2H,  $J = 8\text{Hz}$ ). MS: Cald 319.02, Found  $[\text{M}-\text{H}]^-$  318.11.

7.  $^1\text{H}$  NMR ( $\text{DMSO}-d_6$ ):  $\delta$  12.09 (br, 1H), 9.16 (s, 1H), 8.12 (d, 1H,  $J = 8\text{Hz}$ ), 7.97 (s, 1H), 7.91 (d, 1H,  $J = 8\text{Hz}$ ), 7.74 (m, 2H), 7.64 (t, 1H,  $J = 16\text{Hz}$ ). MS: Cald 319.02, Found  $[\text{M}-\text{H}]^-$  318.28.



8.  $^1\text{H}$  NMR ( $\text{DMSO}-d_6$ ):  $\delta$  11.59 (br, 1H), 9.13 (s, 1H), 8.11 (d, 1H,  $J = 8\text{Hz}$ ), 7.77 (d, 1H,  $J = 8\text{Hz}$ ), 7.73 (d, 1H,  $J = 8\text{Hz}$ ), 7.56 (m, 4H). MS: Cald 319.02, Found  $[\text{M}-\text{H}]^-$  318.28.

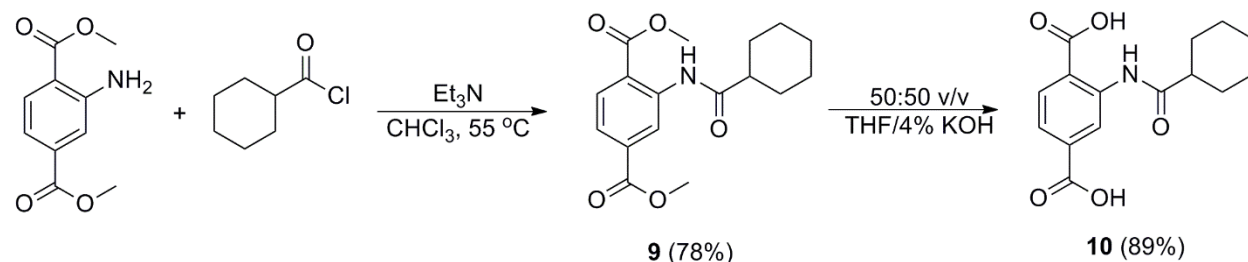

**Figure S3.** Synthesis of AMCy-bdc (**10**).

*Synthesis of 9.* Dimethyl 2-aminoterephthalate (6.5 g, 31.0 mmol) was dissolved in  $\text{CHCl}_3$  (100 mL). Several drops of  $\text{Et}_3\text{N}$  were added to the solution. Cyclohexanecarbonyl chloride (5.0 g, 34.1 mmol) was added to the reaction mixture. The reaction was heated to  $55\text{ }^\circ\text{C}$  overnight. The reaction is cooled to room temperature. **9** was isolated via column chromatography ( $\text{CH}_2\text{Cl}_2$ ) to afford a white solid (7.7 g, 24.2 mmol, 78%).  $^1\text{H}$  NMR ( $\text{CDCl}_3$ ):  $\delta$  11.06 (br, 1H), 9.39 (s, 1H), 8.09 (d, 1H,  $J = 8\text{Hz}$ ), 7.72 (d, 1H,  $J = 8\text{Hz}$ ), 2.35 (t, 1H,  $J = 20\text{ Hz}$ ), 1.73 (m, 10 H). MS: Cald. 319.35, Found  $[\text{M}+\text{H}]^+$ : 320.15.

*Synthesis of 10.* **9** (3.0 g, 9.4 mmol) was dissolved in a 50:50 v/v mixture of THF (100 mL) and 4% KOH (100 mL). The mixture was stirred at room temperature overnight. The aqueous layer was separated and acidified with concentrated HCl to yield a white solid as the product. The white solid was washed with plenty of water (2.4 g, 8.4 mmol, 89%).  $^1\text{H}$  NMR ( $\text{DMSO}-d_6$ ):  $\delta$  11.12 (s, 1H), 9.05 (s, 1H), 8.05 (d, 1H,  $J = 8\text{Hz}$ ), 7.65 (d, 1H,  $J = 8\text{Hz}$ ), 2.30 (m, 1H), 1.90 (d, 2H,  $J = 8\text{Hz}$ ), 1.64 (d, 1H,  $J = 12\text{ Hz}$ ), 1.32 (m, 7H). MS: Cald. 291.11, Found  $[\text{M}-\text{H}]^-$ : 290.18.

## ***MOFs Synthesis.***

*Synthesis of IRMOF-3.* IRMOF-3 was synthesized as previously reported.<sup>1</sup>

*Synthesis of  $\alpha$ -IRMOF-3-AMPh.* AMPh-bdc (113 mg, 0.4 mmol) and  $\text{Zn}(\text{NO}_3)_2 \cdot 6\text{H}_2\text{O}$  (341 mg, 1.1 mmol) were dissolved in *N,N'*-diethylformamide (DEF, 10 mL) via sonication in a scintillation vial. The vial was transferred to and kept in a preheated oven at 120 °C for 24 h. The vial was cooled down to room temperature. Large, dark red cubic crystals were obtained. The crystals were rinsed with DEF (3×10 mL) and  $\text{CHCl}_3$  (3×10 mL). Fresh  $\text{CHCl}_3$  was replaced every day for 3 days. The MOFs were kept in  $\text{CHCl}_3$  until further characterization.

*Synthesis of IRMOF-3-AM4ClPh.* AM4ClPh-bdc (126 mg, 0.4 mmol) and  $\text{Zn}(\text{NO}_3)_2 \cdot 6\text{H}_2\text{O}$  (341 mg, 1.1 mmol) were dissolved in DEF (10 mL) via sonication in a scintillation vial. The vial was transferred to and kept in a preheated oven at 120 °C for 48 h. The vial was cooled down to room temperature. Large, dark red cubic crystals were obtained. The crystals were rinsed with DEF (3×10 mL) and  $\text{CHCl}_3$  (3×10 mL). Fresh  $\text{CHCl}_3$  was replaced every day for 3 days. The MOFs were kept in  $\text{CHCl}_3$  until further characterization.

*Synthesis of IRMOF-3-AM3ClPh.* AM3ClPh-bdc (126 mg, 0.4 mmol) and  $\text{Zn}(\text{NO}_3)_2 \cdot 6\text{H}_2\text{O}$  (341 mg, 1.1 mmol) were dissolved in DEF (10 mL) via sonication in a scintillation vial. The vial was transferred to and kept in a preheated oven at 120 °C for 24 h. The vial was cooled down to room temperature. Large, dark red cubic crystals were obtained. The crystals were rinsed with DEF (3×10 mL) and  $\text{CHCl}_3$  (3×10 mL).

Fresh  $\text{CHCl}_3$  was replaced every day for 3 days. The MOFs were kept in  $\text{CHCl}_3$  until further characterization.

*Synthesis of IRMOF-3-AM2ClPh.* AM2ClPh-bdc (126 mg, 0.4 mmol) and  $\text{Zn}(\text{NO}_3)_2 \cdot 6\text{H}_2\text{O}$  (341 mg, 1.1 mmol) were dissolved in DEF (10 mL) via sonication in a scintillation vial. The vial was transferred to and kept in a preheated oven at 120 °C for 24 h. The vial was cooled down to room temperature. Large, dark red cubic crystals were obtained. The crystals were rinsed with DEF (3×10 mL) and  $\text{CHCl}_3$  (3×10 mL). Fresh  $\text{CHCl}_3$  was replaced every day for 3 days. The MOFs were kept in  $\text{CHCl}_3$  until further characterization.

*Synthesis of IRMOF-3-AMCy.* AMCy-bdc (115 mg, 0.4 mmol) and  $\text{Zn}(\text{NO}_3)_2 \cdot 6\text{H}_2\text{O}$  (341 mg, 1.1 mmol) were dissolved in DMF (10 mL) in a scintillation vial via sonication. The vial was transferred to a pre-heated oven at 120 °C for 24 h. The vial was transferred to and kept in a preheated oven at 120 °C for 24 h. The vial was cooled down to room temperature. Large, colorless cubic crystals were obtained. The crystals were rinsed with DMF (3×10 mL) and  $\text{CHCl}_3$  (3×10 mL). Fresh  $\text{CHCl}_3$  was replaced every day for 3 days. The MOFs were kept in  $\text{CHCl}_3$  until further characterization.

*Postsynthetic modification (PSM) to transform IRMOF-3 to  $\beta$ -IRMOF-3-AMPh.*  $\beta$ -IRMOF-3-AMPh was prepared by combining IRMOF-3 (~120 mg, ~0.4 mmol equiv of  $-\text{NH}_2$ ) with benzoic anhydride (90 mg, 0.4 mmol) dissolved in  $\text{CHCl}_3$  (4 mL) in a scintillation vial. The vial was transferred to and kept in a preheated oven at 55 °C for 17 d. A fresh benzoic anhydride solution was used to replace the reaction solution every

day. The MOF crystals were rinsed with  $\text{CHCl}_3$  ( $3 \times 10$  mL) every day for 3 d before further characterization.

### **MOFs Characterization.**

*Powder X-ray Diffraction Analysis.* Approximately 20-30 mg of MOF material was dried in air for ~30 second and polarized to become a homogeneous powder prior to PXRD analysis. PXRD data was collected at ambient temperature on a Bruker D8 Advance diffractometer using a LynxEye detector at 40 kV, 40 mA for Cu  $K\alpha$  ( $\lambda = 1.5418 \text{ \AA}$ ), with a scan speed of 1 sec/step, a step size of  $0.02^\circ$ ,  $2\theta$  range of  $5\text{-}45^\circ$ .

*BET Surface Area and Gas Sorption Analysis.* A common activation process was applied for all MOFs reported in this study. Briefly, ~30-100 mg of MOF material was evacuated under vacuum for ~1 min at room temperature to remove residual  $\text{CHCl}_3$  storage solvent. Samples were then transferred to a pre-weighed sample tube and degassed at  $150^\circ\text{C}$  on a Micromeritics ASAP 2020 Adsorption Analyzer for a minimum of 12 h or until the outgas rate was  $<5 \text{ mmHg/min}$ . The sample tube was re-weighed to obtain a consistent mass for the degassed MOF. Brunauer-Emmett-Teller (BET) surface area ( $\text{m}^2/\text{g}$ ) measurements were collected at 77 K with  $\text{N}_2$  on a Micromeritics ASAP 2020 Adsorption Analyzer using a volumetric technique. The samples were then manually degassed at  $150^\circ\text{C}$  for at least 12 h prior to  $\text{H}_2$  isotherm at 77 K.

*Single Crystal X-ray Diffraction.* Single crystal of IRMOFs taken from  $\text{CHCl}_3$  were mounted on nylon loops with paratone oil and placed under a nitrogen cold stream at 100

K and 280 K. Data was collected on a Bruker Apex diffractometer using Cu K $\alpha$  ( $\lambda$ = 1.5418 Å) or Mo K $\alpha$  ( $\lambda$ = 0.71073 Å) radiation controlled using the APEX 2010 software package. A multi-scan method utilizing equivalents was employed to correct for absorption. All data collections were solved and refined using the SHELXTL software suite.<sup>2</sup> Structures of IRMOFs were treated with the “SQUEEZE” protocol in PLATON<sup>3</sup> to account for partially occupied or disordered solvent (e.g. DEF, CHCl<sub>3</sub>) within the porous framework.

Attempts to solve and refine disordered IRMOF-3-AM3ClPh, IRMOF-3-AM2ClPh, and IRMOF-3AMCy have been tried in Cubic *P* system. However, the outcomes are the same whether the disordered structures were solved and refined in Cubic *F* or Cubic *P* systems.

*Digestion and Analysis by <sup>1</sup>H NMR.* MOF materials (~10 mg) were dried under vacuum at room temperature overnight. MOF materials were then digested with DMSO-*d*<sub>6</sub> (800  $\mu$ L) and 35% DCl in D<sub>2</sub>O (5  $\mu$ L).

*Mass Spectrometry Analysis.* Electrospray ionization mass spectrometry (ESI-MS) was performed using a ThermoFinnigan LCQ-DECA mass spectrometer and the data was analyzed using the Xcalibur software suite. MOFs digested for <sup>1</sup>H NMR analysis were used for MS experiments.

*Thermalgravimetric Analysis.* Approximately 10-15 mg of MOF materials were used for thermogravimetric analysis (TGA) measurements, immediately after collection of gas sorption data (i.e. activated samples). Samples were analyzed under a stream of N<sub>2</sub> (10 ml/min) using a TA Instrument Q600 SDT running from room temperature to 600 °C with a ramping rate of 5 °C/min.

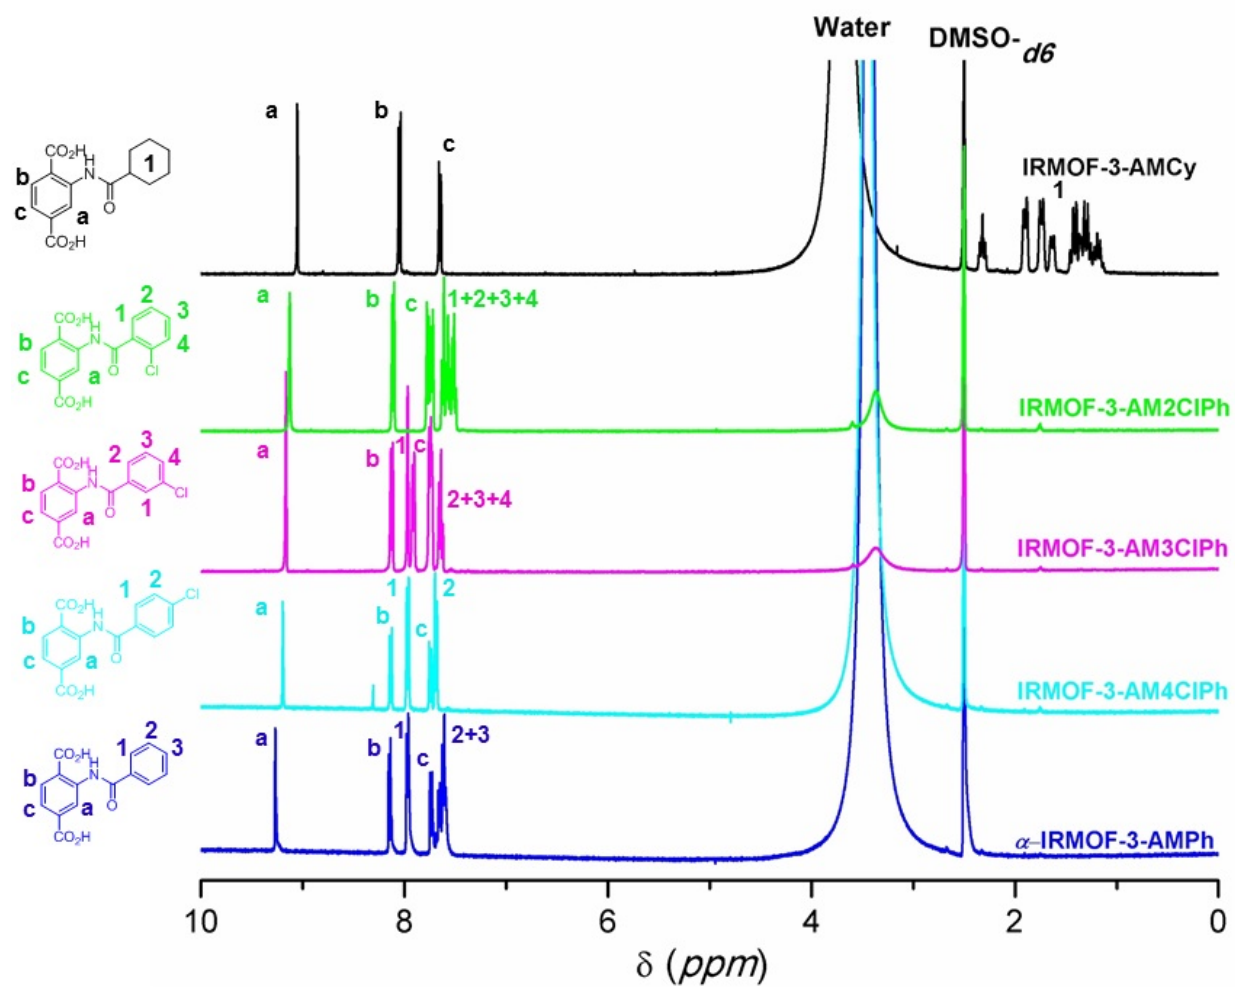

**Figure S4.** Digestion and  $^1\text{H}$  NMR analysis of IRMOFs.

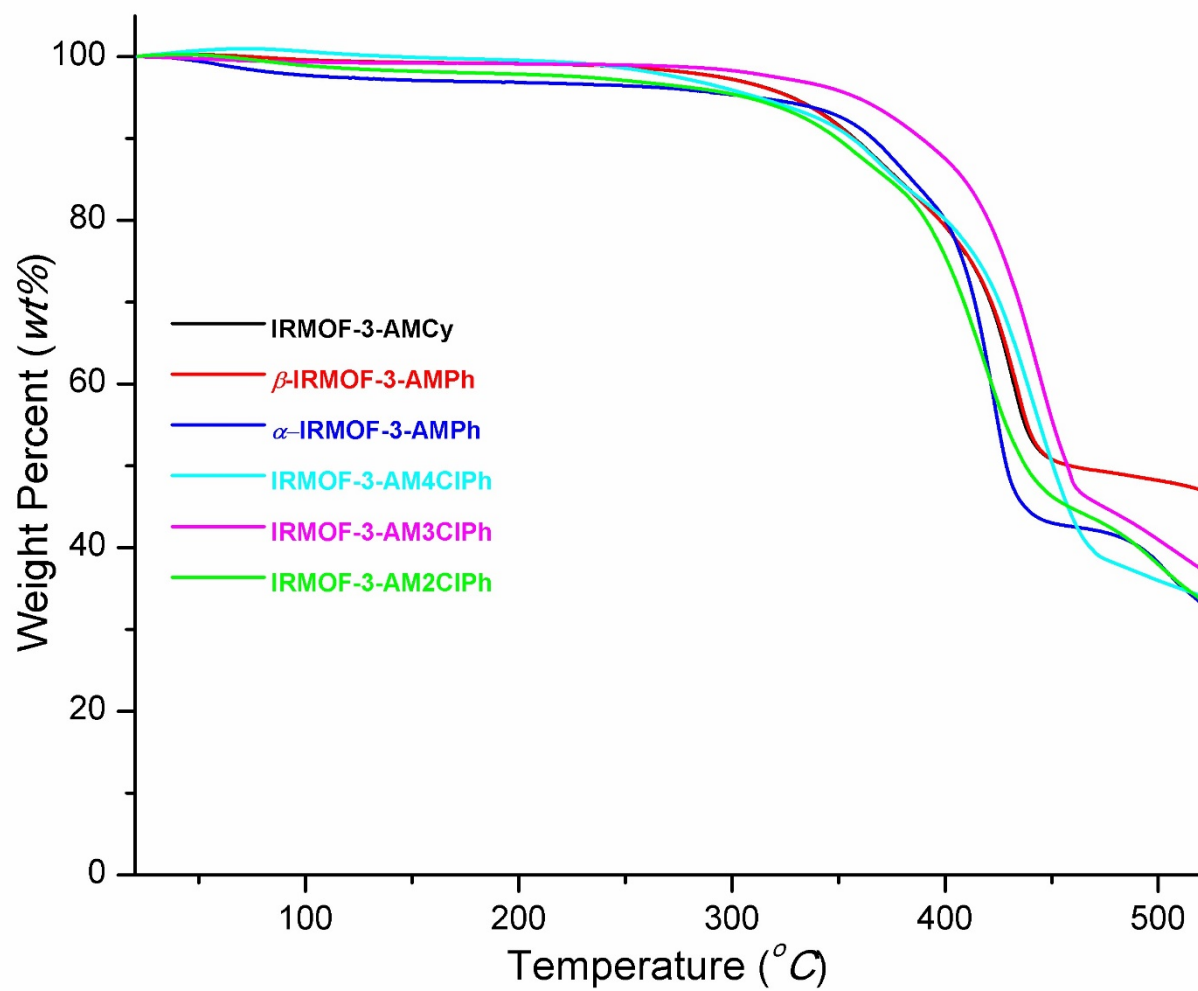

**Figure S5.** Thermal gravimetric analysis (TGA) of IRMOFs.



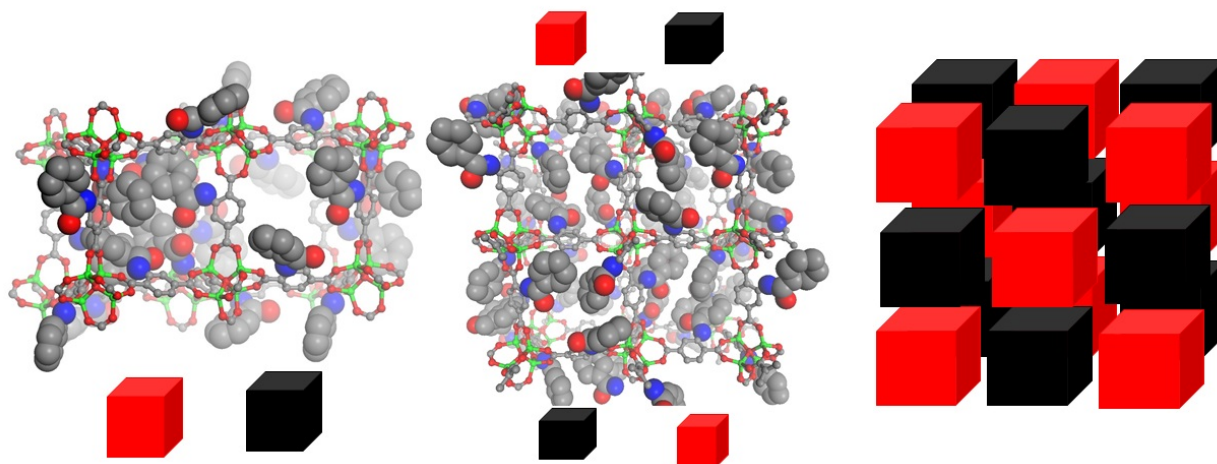

**Figure S6.** Crystal structures of  $\alpha$ -IRMOF-3-AMPh (left), highlighting a unit with 6 different –AMPh groups (red cubes) and a unit without any –AMPh group (black cube). Expand of the alternating packing structure of  $\alpha$ -IRMOF-3-AMPh (middle). Schematic representation of the long range order of  $\alpha$ -IRMOF-3-AMPh, showing alternative packing between units with 6 different –AMPh groups (red cubes), and units without any –AMPh group (black cube). Color scheme: carbon (grey), chlorine (pale green), nitrogen (blue), oxygen (red), zinc (green).

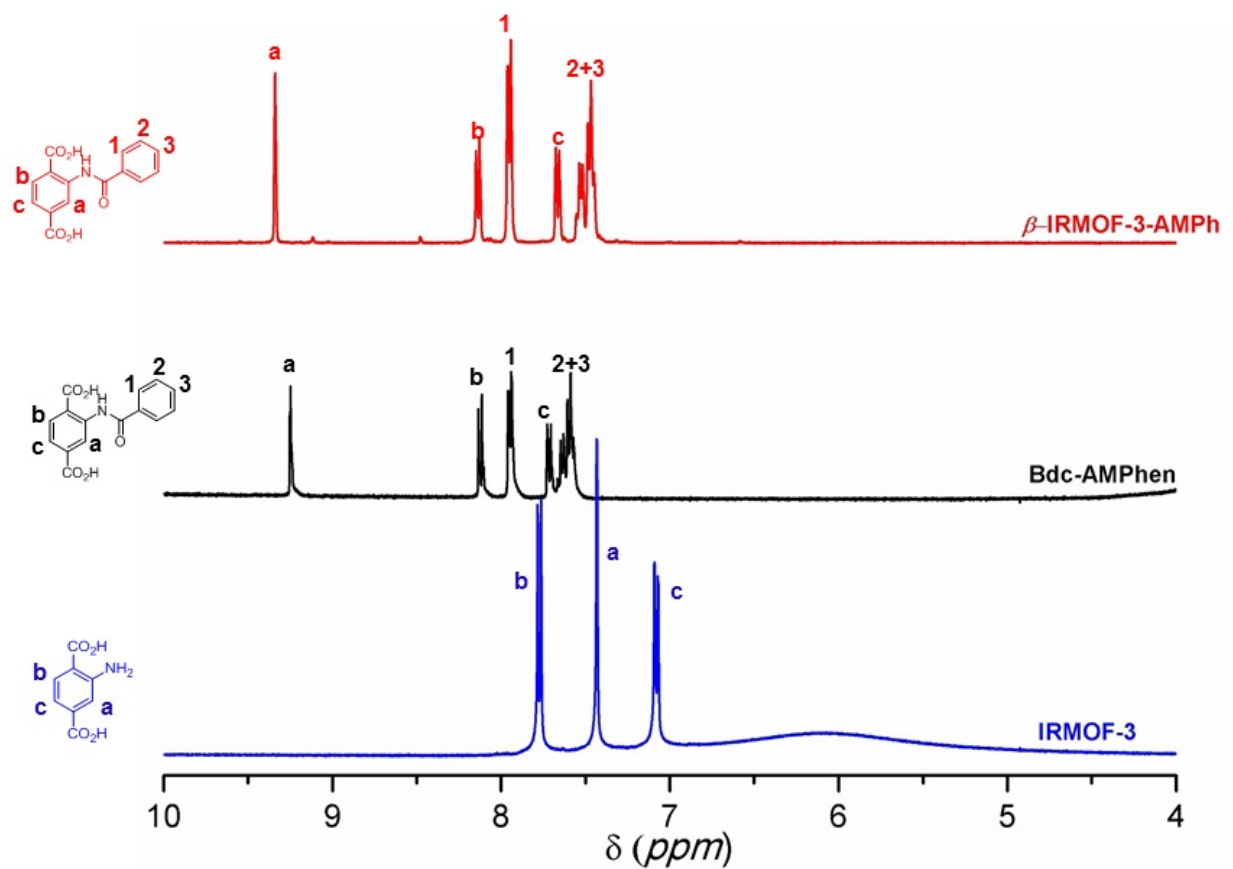

**Figure S7.** Digestion and  $^1\text{H}$  NMR analysis of IRMOF-3 (blue) and  $\beta$ -IRMOF-3-AMPh (red). The free AMPh-bdc is represented in the black line for comparison, showing the quantitative PSM to transform IRMOF-3 to  $\beta$ -IRMOF-3-AMPh.

PSaa3-a #88-91 RT: 0.85-0.88 AV: 4 SB: 4 0.61-0.69 NL: 2.63E7  
F: - c Full ms [90.00-500.00]

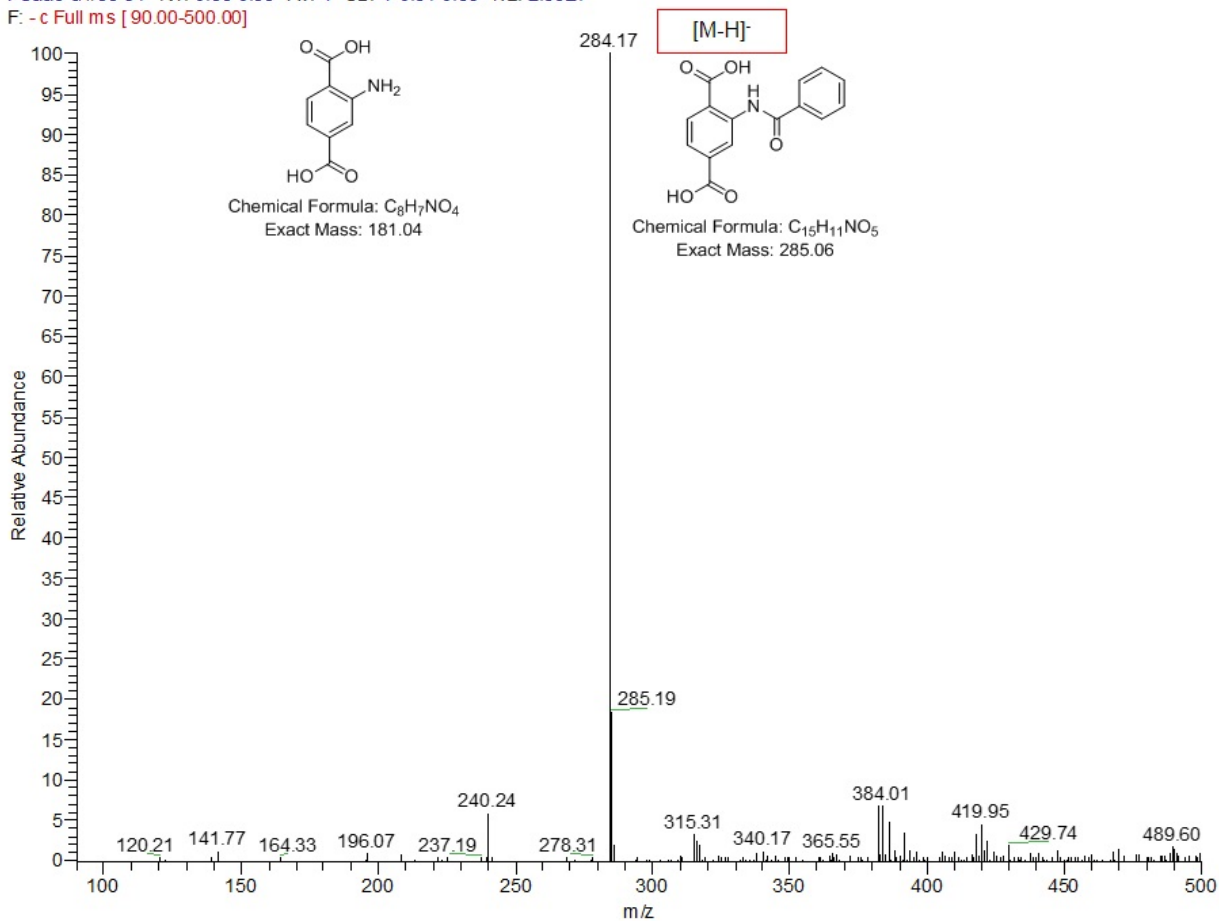

**Figure S8.** ESI-MS analysis of  $\beta$ -IRMOF-3-AMPh showing no trace of free NH<sub>2</sub>-bdc.

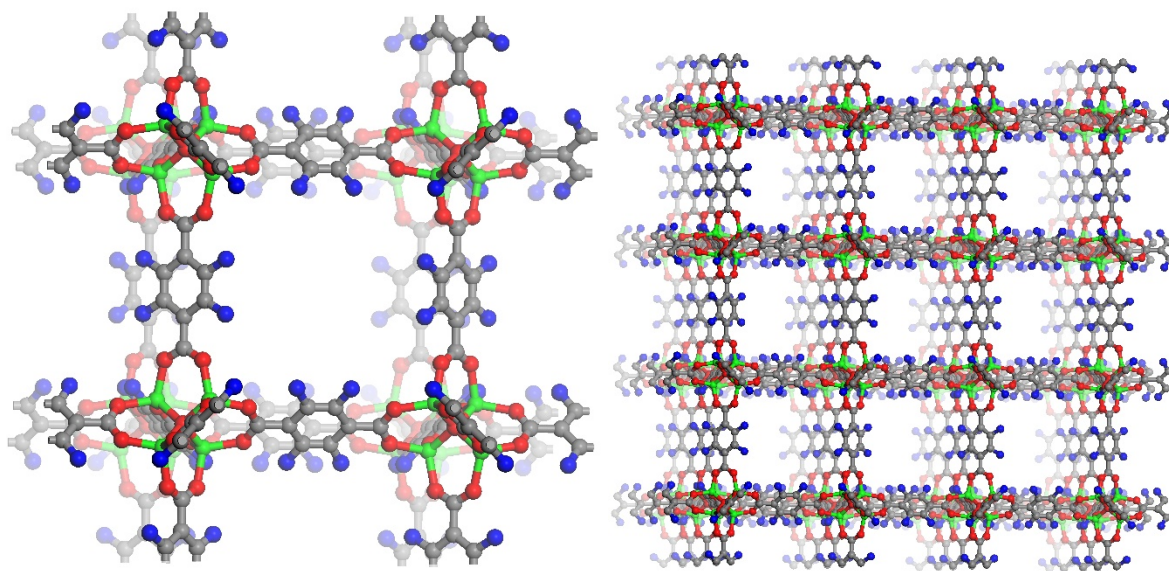

**Figure S9.** Crystal structure of disordered  $\beta$ -IRMOF-3-AMPh. Structure of one cubic unit of IRMOF-3-AMPh (left), showing the –AMPh group is disordered over 4 positions and cannot be located or refined. The overall structure of  $\beta$ -IRMOF-3-AMPh (right), showing the irregular, unorganized –AMPh groups (only nitrogen atom shown) throughout the infinite lattice. Color scheme: carbon (grey), nitrogen (blue), oxygen (red), zinc (green). Hydrogen atoms are omitted for clarity.

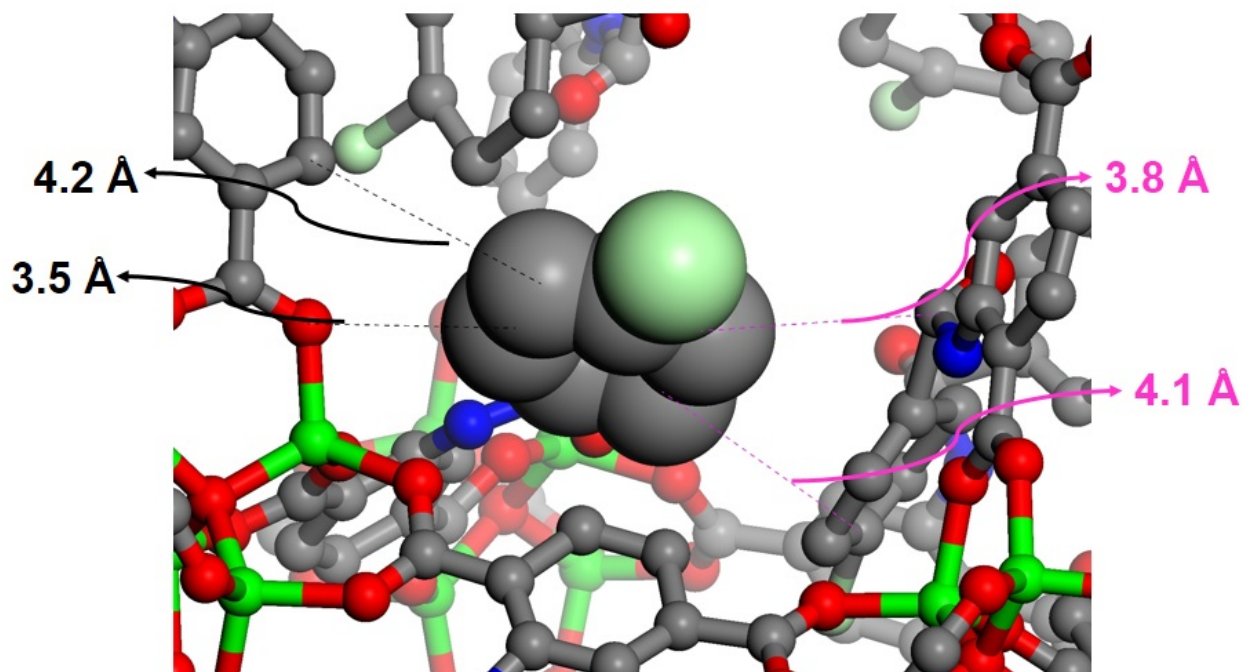

**Figure S10.** Crystal structure of IRMOF-3-AM4ClPh, highlighting the interatomic distance between the –AM4ClPh group and neighboring groups. Color scheme: carbon (grey), chlorine (pale green), nitrogen (blue), oxygen (red), zinc (green). Hydrogen atoms are omitted for clarity.

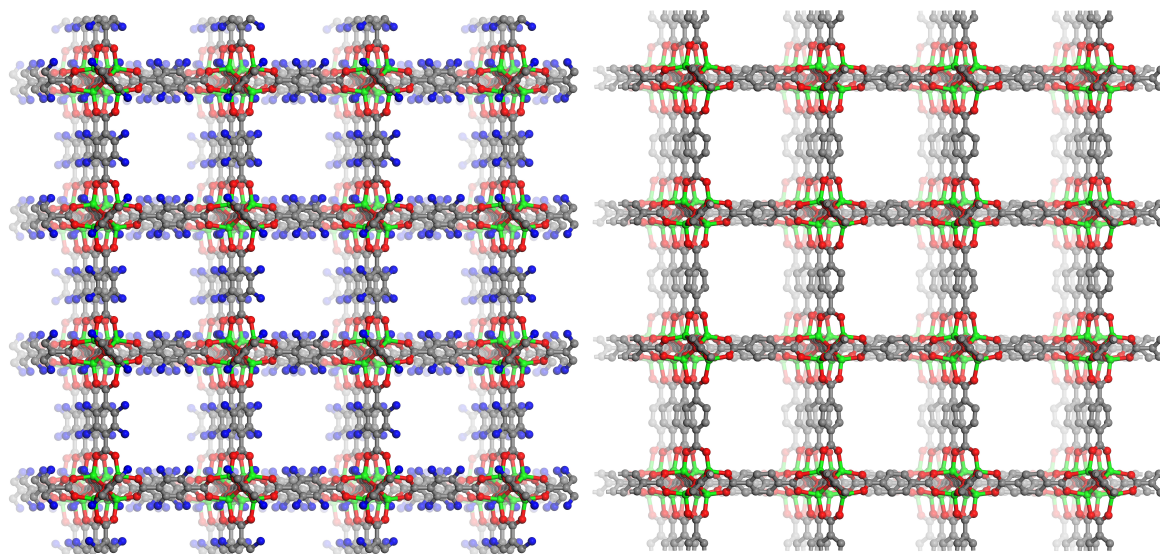

**Figure S11.** Crystal structure of IRMOF-3-AM3ClPh (left) and IRMOF-3-AM2ClPh (right).

The overall structures show that the disordered functional groups cannot be located and are distributed randomly in the infinite lattice. Color scheme: carbon (grey), nitrogen (blue), oxygen (red), zinc (green). Hydrogen atoms are omitted for clarity.



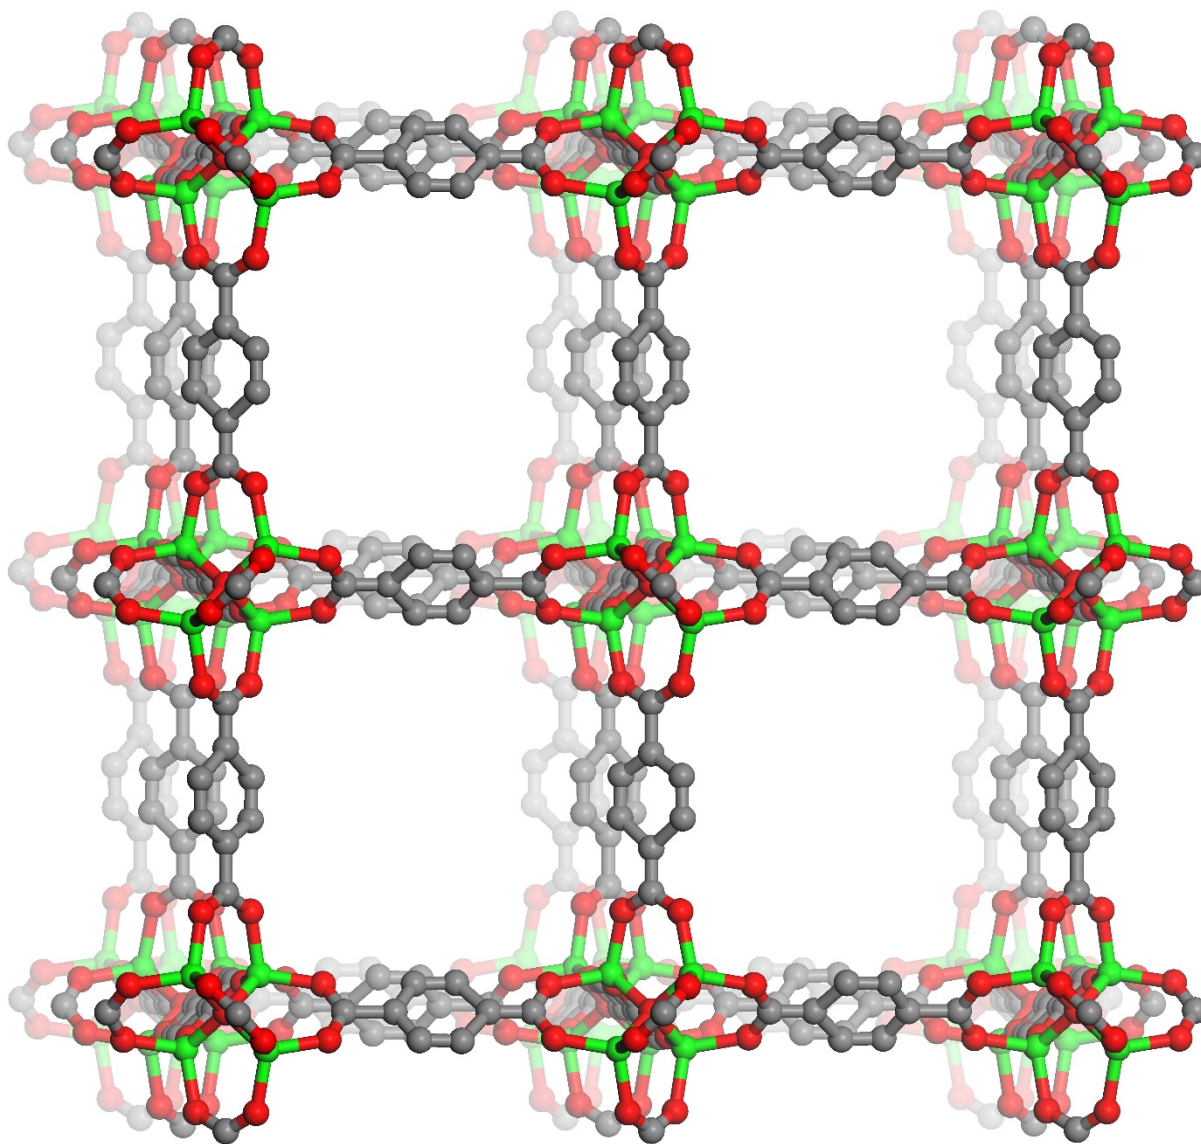

**Figure S12.** Crystal structure of IRMOF-3-AMCy, indicating unorganized –AMCy groups throughout the infinite lattice. Color scheme: carbon (grey), nitrogen (blue), oxygen (red), zinc (green). Hydrogen atoms are omitted for clarity.

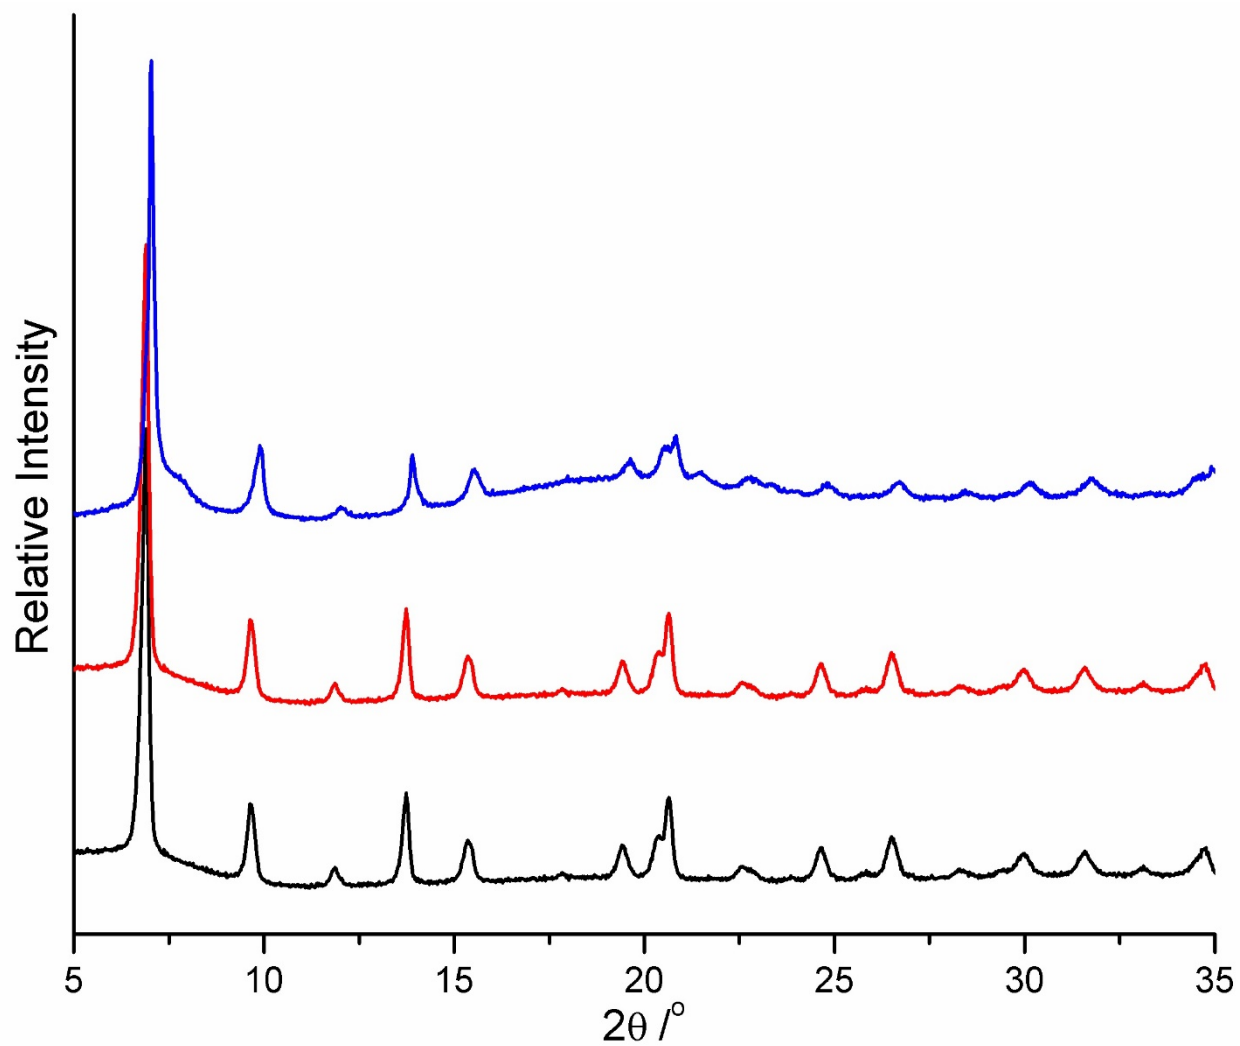

**Figure S13.** PXRD analysis of IRMOF-3-AM2ClPh (black), IRMOF-3-AM3ClPh (red), and IRMOF-3-AMCy (blue).



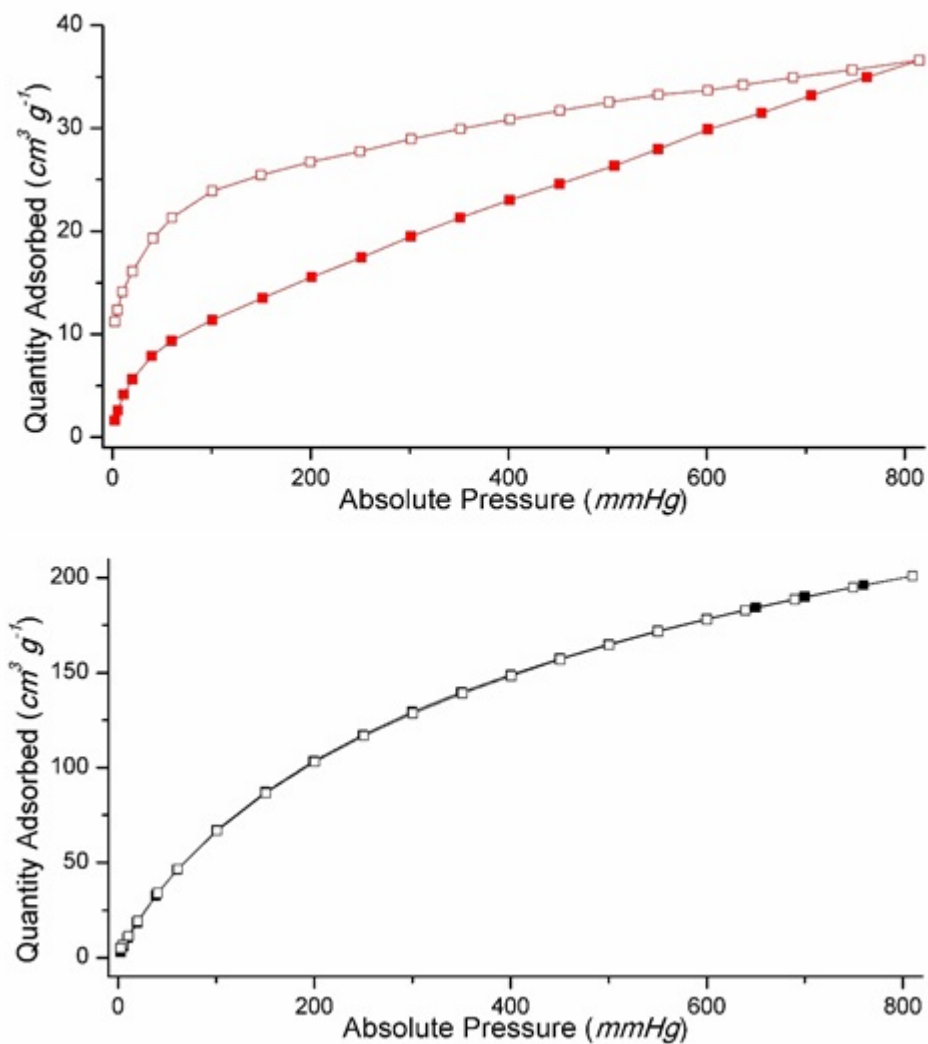

**Figure S14.** H<sub>2</sub> sorption isotherms at 77 K of  $\alpha$ -IRMOF-3-AMPh (red, top) and  $\beta$ -IRMOF-3-AMPh (black, bottom). Filled symbols represent adsorption process, and emptied symbols represent desorption process.

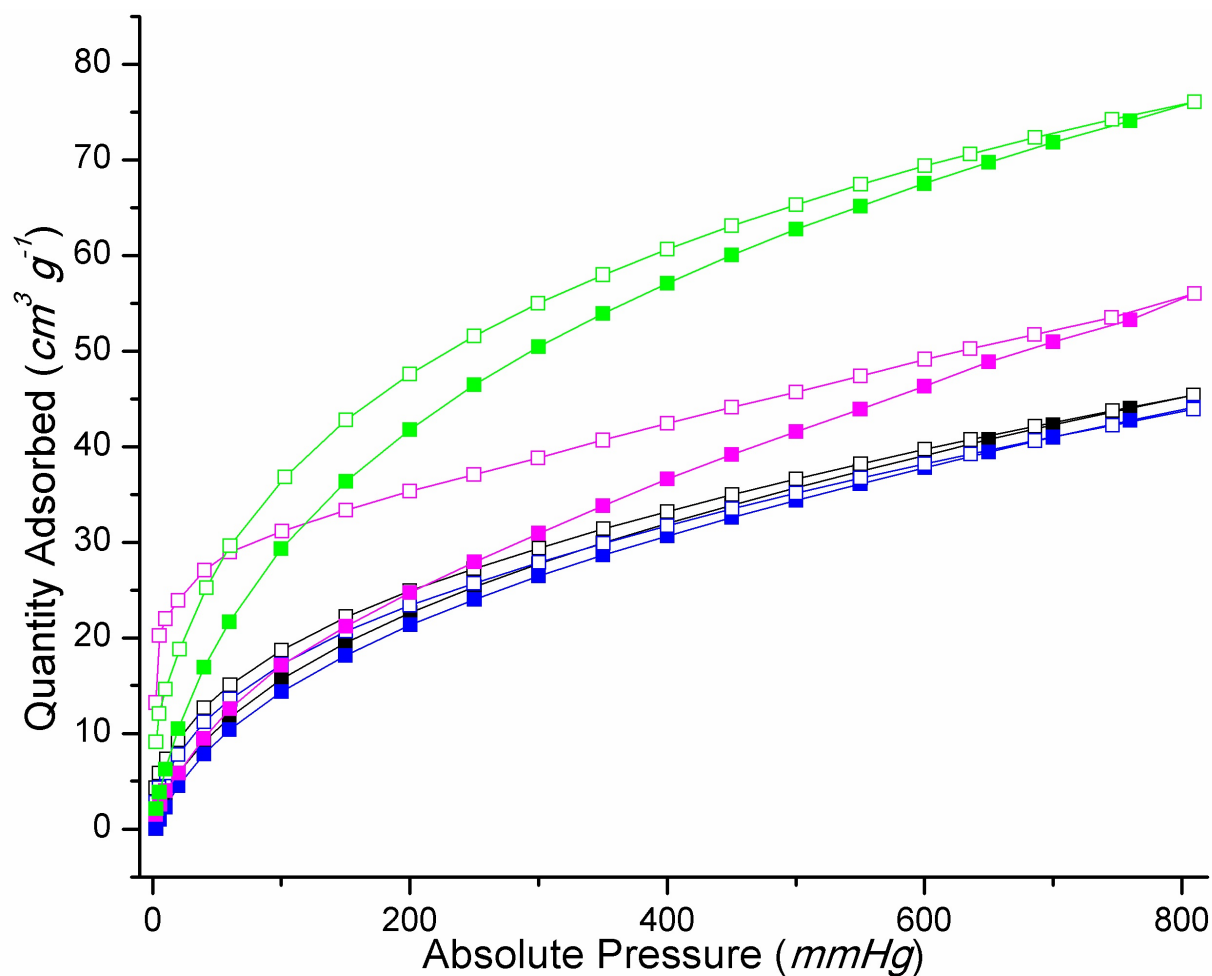

**Figure S15.** H<sub>2</sub> sorption isotherms at 77 K of IRMOF-3-AMCy (green), IRMOF-3-AM4ClPh (magenta), IRMOF-3-AM2ClPh (black), and IRMOF-3-AM3ClPh (blue). Filled symbols represent adsorption process, and emptied symbols represent desorption process.

**Table S1.** Summary BET surface areas of IRMOFs.

| MOFs                   | BET surface area ( $\text{m}^2 \text{g}^{-1}$ ) <sup>a</sup> |
|------------------------|--------------------------------------------------------------|
| $\alpha$ -IRMOF-3-AMPh | 7 $\pm$ 6                                                    |
| $\beta$ -IRMOF-3-AMPh  | 1521 $\pm$ 28                                                |
| IRMOF-3-AM4ClPh        | 66 $\pm$ 4                                                   |
| IRMOF-3-AM3ClPh        | 169 $\pm$ 14                                                 |
| IRMOF-3-AM2ClPh        | 229 $\pm$ 42                                                 |
| IRMOF-3-AMCy           | 436 $\pm$ 31                                                 |

<sup>a</sup> The results and standard deviation were calculated from either 2 or 3 independent measurements from different samples.

**Table S2.** Crystal system of IRMOFs at different temperature (100 K and 280 K), showing that the frameworks are disordered or ordered at both low temperature and high temperature.

| IRMOF-3- | AMPh ( $\alpha$ -) | AMPh ( $\beta$ -) | AM4ClPh   | AM3ClPh   | AM2ClPh   | AMCy      |
|----------|--------------------|-------------------|-----------|-----------|-----------|-----------|
| 100 K    | Cubic $P$          | Cubic $F$         | Cubic $P$ | Cubic $F$ | Cubic $F$ | Cubic $F$ |
| 280 K    | Cubic $P$          | Cubic $F$         | Cubic $P$ | Cubic $F$ | Cubic $F$ | Cubic $F$ |

**Table S3.** Crystal data and structure refinement for  $\alpha$ -IRMOF-3-AMPh.

|                                   |                                                                                |
|-----------------------------------|--------------------------------------------------------------------------------|
| Identification code               | $\alpha$ -IRMOF-3-AMPh                                                         |
| Empirical formula                 | C <sub>45</sub> H <sub>27</sub> N <sub>3</sub> O <sub>13</sub> Zn <sub>4</sub> |
| Formula weight                    | 1127.18                                                                        |
| Temperature                       | 100(2) K                                                                       |
| Wavelength                        | 0.71073 Å                                                                      |
| Crystal system                    | Cubic                                                                          |
| Space group                       | Pa-3                                                                           |
| Unit cell dimensions              | a = b = c = 25.5775(18) Å $\alpha = \beta = \gamma = 90^\circ$                 |
| Volume                            | 16733(2) Å <sup>3</sup>                                                        |
| Z                                 | 8                                                                              |
| Density (calculated)              | 0.835 Mg/m <sup>3</sup>                                                        |
| Absorption coefficient            | 1.168 mm <sup>-1</sup>                                                         |
| F(000)                            | 4528                                                                           |
| Crystal size                      | 0.20 x 0.10 x 0.10 mm <sup>3</sup>                                             |
| Theta range for data collection   | 1.59 to 23.26°                                                                 |
| Index ranges                      | 0 ≤ h ≤ 19, 0 ≤ k ≤ 20, 2 ≤ l ≤ 28                                             |
| Reflections collected             | 4009                                                                           |
| Independent reflections           | 4009 [R(int) = 0.0545]                                                         |
| Completeness to theta = 23.26°    | 99.8 %                                                                         |
| Absorption correction             | Semi-empirical from equivalents                                                |
| Max. and min. transmission        | 0.9111 and 0.8910                                                              |
| Refinement method                 | Full-matrix least-squares on F <sup>2</sup>                                    |
| Data / restraints / parameters    | 4009 / 15 / 136                                                                |
| Goodness-of-fit on F <sup>2</sup> | 1.008                                                                          |
| Final R indices [I > 2σ(I)]       | R1 = 0.0947, wR2 = 0.2677                                                      |
| R indices (all data)              | R1 = 0.1271, wR2 = 0.2881                                                      |
| Largest diff. peak and hole       | 0.605 and -1.133 e.Å <sup>-3</sup>                                             |

**Table S4.** Crystal data and structure refinement for  $\beta$ -IRMOF-3-AMPh.

|                                   |                                                                 |
|-----------------------------------|-----------------------------------------------------------------|
| Identification code               | $\beta$ -IRMOF-3-AMPh                                           |
| Empirical formula                 | C <sub>24</sub> N <sub>6</sub> O <sub>13</sub> Zn <sub>4</sub>  |
| Formula weight                    | 841.78                                                          |
| Temperature                       | 100(2) K                                                        |
| Wavelength                        | 1.54178 Å                                                       |
| Crystal system                    | Cubic                                                           |
| Space group                       | Fm-3m                                                           |
| Unit cell dimensions              | a = b = c = 25.7009(9) Å $\alpha = \beta = \gamma = 90^\circ$ . |
| Volume                            | 16976.4(10) Å <sup>3</sup>                                      |
| Z                                 | 8                                                               |
| Density (calculated)              | 0.659 Mg/m <sup>3</sup>                                         |
| Absorption coefficient            | 1.522 mm <sup>-1</sup>                                          |
| F(000)                            | 3280                                                            |
| Crystal size                      | 0.40 x 0.40 x 0.30 mm <sup>3</sup>                              |
| Theta range for data collection   | 2.98 to 67.96°.                                                 |
| Index ranges                      | 0 ≤ h ≤ 17, 0 ≤ k ≤ 21, 1 ≤ l ≤ 30                              |
| Reflections collected             | 836                                                             |
| Independent reflections           | 836 [R(int) = 0.0000]                                           |
| Completeness to theta = 67.96°    | 100.0 %                                                         |
| Absorption correction             | Semi-empirical from equivalents                                 |
| Max. and min. transmission        | 0.9364 and 0.9153                                               |
| Refinement method                 | Full-matrix least-squares on F <sup>2</sup>                     |
| Data / restraints / parameters    | 836 / 0 / 31                                                    |
| Goodness-of-fit on F <sup>2</sup> | 1.274                                                           |
| Final R indices [I > 2σ(I)]       | R <sub>1</sub> = 0.0749, wR <sub>2</sub> = 0.2656               |
| R indices (all data)              | R <sub>1</sub> = 0.0780, wR <sub>2</sub> = 0.2699               |
| Largest diff. peak and hole       | 0.427 and -0.636 e.Å <sup>-3</sup>                              |

**Table S5.** Crystal data and structure refinement for IRMOF-3-AM4ClPh.

|                                   |                                                                                                |
|-----------------------------------|------------------------------------------------------------------------------------------------|
| Identification code               | IRMOF-3-AM4ClPh                                                                                |
| Empirical formula                 | C <sub>45</sub> H <sub>24</sub> Cl <sub>3</sub> N <sub>3</sub> O <sub>16</sub> Zn <sub>4</sub> |
| Formula weight                    | 1230.50                                                                                        |
| Temperature                       | 100(2) K                                                                                       |
| Wavelength                        | 0.71073 Å                                                                                      |
| Crystal system                    | Cubic                                                                                          |
| Space group                       | Pa-3                                                                                           |
| Unit cell dimensions              | a = b = c = 25.3840(10) Å $\alpha = \beta = \gamma = 90^\circ$                                 |
| Volume                            | 16356.1(11) Å <sup>3</sup>                                                                     |
| Z                                 | 8                                                                                              |
| Density (calculated)              | 0.997 Mg/m <sup>3</sup>                                                                        |
| Absorption coefficient            | 1.300 mm <sup>-1</sup>                                                                         |
| F(000)                            | 4888                                                                                           |
| Crystal size                      | 0.50 x 0.50 x 0.40 mm <sup>3</sup>                                                             |
| Theta range for data collection   | 1.79 to 25.33°.                                                                                |
| Index ranges                      | 0 ≤ h ≤ 21, 0 ≤ k ≤ 21, 2 ≤ l ≤ 30                                                             |
| Reflections collected             | 4997                                                                                           |
| Independent reflections           | 4997 [R(int) = 0.0000]                                                                         |
| Completeness to theta = 25.33°    | 99.8 %                                                                                         |
| Absorption correction             | Semi-empirical from equivalents                                                                |
| Max. and min. transmission        | 0.8856 and 0.8657                                                                              |
| Refinement method                 | Full-matrix least-squares on F <sup>2</sup>                                                    |
| Data / restraints / parameters    | 4997 / 15 / 99                                                                                 |
| Goodness-of-fit on F <sup>2</sup> | 1.576                                                                                          |
| Final R indices [I > 2σ(I)]       | R <sub>1</sub> = 0.1544, wR <sub>2</sub> = 0.4234                                              |
| R indices (all data)              | R <sub>1</sub> = 0.1882, wR <sub>2</sub> = 0.4419                                              |
| Largest diff. peak and hole       | 1.678 and -0.874 e.Å <sup>-3</sup>                                                             |

**Table S6.** Crystal data and structure refinement for IRMOF-3-AM3CIPh.

|                                   |                                                                |
|-----------------------------------|----------------------------------------------------------------|
| Identification code               | IRMOF-3-AM3CIPh                                                |
| Empirical formula                 | C <sub>24</sub> N <sub>6</sub> O <sub>13</sub> Zn <sub>4</sub> |
| Formula weight                    | 841.78                                                         |
| Temperature                       | 100(2) K                                                       |
| Wavelength                        | 1.54178 Å                                                      |
| Crystal system                    | Cubic                                                          |
| Space group                       | Fm-3m                                                          |
| Unit cell dimensions              | a = b = c = 25.6910(17) Å $\alpha = \beta = \gamma = 90^\circ$ |
| Volume                            | 16956.8(19) Å <sup>3</sup>                                     |
| Z                                 | 8                                                              |
| Density (calculated)              | 0.659 Mg/m <sup>3</sup>                                        |
| Absorption coefficient            | 1.524 mm <sup>-1</sup>                                         |
| F(000)                            | 3280                                                           |
| Crystal size                      | 0.30 x 0.30 x 0.30 mm <sup>3</sup>                             |
| Theta range for data collection   | 6.89 to 68.02°.                                                |
| Index ranges                      | 0 ≤ h ≤ 17, 0 ≤ k ≤ 21, 3 ≤ l ≤ 30                             |
| Reflections collected             | 814                                                            |
| Independent reflections           | 814 [R(int) = 0.0368]                                          |
| Completeness to theta = 68.02°    | 97.4 %                                                         |
| Absorption correction             | Semi-empirical from equivalents                                |
| Max. and min. transmission        | 0.8972 and 0.8729                                              |
| Refinement method                 | Full-matrix least-squares on F <sup>2</sup>                    |
| Data / restraints / parameters    | 814 / 0 / 31                                                   |
| Goodness-of-fit on F <sup>2</sup> | 1.425                                                          |
| Final R indices [I > 2σ(I)]       | R <sub>1</sub> = 0.0930, wR <sub>2</sub> = 0.3115              |
| R indices (all data)              | R <sub>1</sub> = 0.1035, wR <sub>2</sub> = 0.3386              |
| Largest diff. peak and hole       | 0.454 and -0.615 e.Å <sup>-3</sup>                             |

**Table S7.** Crystal data and structure refinement for IRMOF-3-AM2ClPh.

|                                   |                                                                |
|-----------------------------------|----------------------------------------------------------------|
| Identification code               | IRMOF-3-AM2ClPh                                                |
| Empirical formula                 | C <sub>24</sub> O <sub>13</sub> Zn <sub>4</sub>                |
| Formula weight                    | 757.72                                                         |
| Temperature                       | 293(2) K                                                       |
| Wavelength                        | 1.54178 Å                                                      |
| Crystal system                    | Cubic                                                          |
| Space group                       | F-43m                                                          |
| Unit cell dimensions              | a = b = c = 25.6590(13) Å $\alpha = \beta = \gamma = 90^\circ$ |
| Volume                            | 16893.5(15) Å <sup>3</sup>                                     |
| Z                                 | 8                                                              |
| Density (calculated)              | 0.596 Mg/m <sup>3</sup>                                        |
| Absorption coefficient            | 1.481 mm <sup>-1</sup>                                         |
| F(000)                            | 2944                                                           |
| Crystal size                      | 0.40 x 0.40 x 0.40 mm <sup>3</sup>                             |
| Theta range for data collection   | 4.87 to 69.42°.                                                |
| Index ranges                      | -16 ≤ h ≤ 17, 0 ≤ k ≤ 21, 2 ≤ l ≤ 31                           |
| Reflections collected             | 1528                                                           |
| Independent reflections           | 1528 [R(int) = 0.0586]                                         |
| Completeness to theta = 69.42°    | 97.8 %                                                         |
| Absorption correction             | Semi-empirical from equivalents                                |
| Max. and min. transmission        | 0.9120 and 0.8972                                              |
| Refinement method                 | Full-matrix least-squares on F <sup>2</sup>                    |
| Data / restraints / parameters    | 1528 / 2 / 45                                                  |
| Goodness-of-fit on F <sup>2</sup> | 1.038                                                          |
| Final R indices [I > 2sigma(I)]   | R <sub>1</sub> = 0.0832, wR <sub>2</sub> = 0.2490              |
| R indices (all data)              | R <sub>1</sub> = 0.1053, wR <sub>2</sub> = 0.2783              |



**Table S8.** Crystal data and structure refinement for IRMOF-3-AMCy.

|                                   |                                                               |
|-----------------------------------|---------------------------------------------------------------|
| Identification code               | IRMOF-3-AMCy                                                  |
| Empirical formula                 | C <sub>24</sub> O <sub>13</sub> Zn <sub>4</sub>               |
| Formula weight                    | 757.72                                                        |
| Temperature                       | 100(2) K                                                      |
| Wavelength                        | 1.54178 Å                                                     |
| Crystal system                    | Cubic                                                         |
| Space group                       | F-43m                                                         |
| Unit cell dimensions              | a = b = c = 25.6177(9) Å $\alpha = \beta = \gamma = 90^\circ$ |
| Volume                            | 16812.0(10) Å <sup>3</sup>                                    |
| Z                                 | 8                                                             |
| Density (calculated)              | 0.599 Mg/m <sup>3</sup>                                       |
| Absorption coefficient            | 1.488 mm <sup>-1</sup>                                        |
| F(000)                            | 2944                                                          |
| Crystal size                      | 0.40 x 0.40 x 0.10 mm <sup>3</sup>                            |
| Theta range for data collection   | 6.91 to 68.43°.                                               |
| Index ranges                      | -16 ≤ h ≤ 12, 0 ≤ k ≤ 21, 3 ≤ l ≤ 30                          |
| Reflections collected             | 1391                                                          |
| Independent reflections           | 1391 [R(int) = 0.0405]                                        |
| Completeness to theta = 68.43°    | 96.2 %                                                        |
| Absorption correction             | Semi-empirical from equivalents                               |
| Max. and min. transmission        | 0.9324 and 0.9123                                             |
| Refinement method                 | Full-matrix least-squares on F <sup>2</sup>                   |
| Data / restraints / parameters    | 1391 / 0 / 46                                                 |
| Goodness-of-fit on F <sup>2</sup> | 1.359                                                         |
| Final R indices [I > 2σ(I)]       | R <sub>1</sub> = 0.1331, wR <sub>2</sub> = 0.3197             |
| R indices (all data)              | R <sub>1</sub> = 0.1489, wR <sub>2</sub> = 0.3407             |
| Absolute structure parameter      | 0.2(4)                                                        |
| Largest diff. peak and hole       | 1.442 and -1.040 e.Å <sup>-3</sup>                            |

## References.

- (1) Wang, Z.; Tanabe, K. K.; Cohen, S. M. *Chem. Eur. J.* **2010**, *16*, 212.
- (2) Sheldrick, G. M. *Acta Cryst.* **2008**, *A64*, 122.
- (3) Spek, A. L. *Acta Cryst.* **2009**, *D65*, 148.
